# Supplementary material for: Taurine Supplementation Increases Post-Exercise Lipid Oxidation at Moderate Intensity in Fasted Healthy Males
Source: PubMed Central journal article supplement (PMC7285212; doi:10.3390/nu12051540), 2020-05-25
Supplement: nutrients-12-01540-s001.pdf [file nutrients-12-01540-s001.pdf]

**Supplementary Table S1.** Time-point of measures of oxygen uptake (VO<sub>2</sub>), carbon dioxide production (VCO<sub>2</sub>), respiratory quotient (RQ) and substrate oxidation in the 10 minutes of the calorimetry test for all groups/supplementation.

| <b>VO<sub>2</sub></b>  | <b>1min</b> | <b>2min</b>            | <b>3min</b>      | <b>4min</b>        | <b>5min</b>          | <b>6min</b>            | <b>7min</b>                | <b>8min</b>              | <b>9min</b>                | <b>10min</b>                 |
|------------------------|-------------|------------------------|------------------|--------------------|----------------------|------------------------|----------------------------|--------------------------|----------------------------|------------------------------|
| PLACEBO                | 0.91±0.2    | 0.55±0.08<br>a         | 0.46±0.04<br>a,b | 0.44±0.05<br>a,b   | 0.43±0.06<br>a,b,c   | 0.4±0.04<br>a,b,c,d,e  | 0.4±0.05<br>a,b,c,d,e      | 0.39±0.07<br>a,b,c,d,e   | 0.37±0.05<br>a,b,c,d,e,f   | 0.37±0.05<br>a,b,c,d,e,f     |
| TAU 3g                 | 0.93±0.2    | 0.58±0.09 <sup>a</sup> | 0.48±0.05<br>a,b | 0.45±0.02<br>a,b,c | 0.43±0.04<br>a,b,c   | 0.4±0.04<br>a,b,c,d,e  | 0.4±0.04<br>a,b,c,d,e      | 0.39±0.04<br>a,b,c,d,e   | 0.38±0.04<br>a,b,c,d,e     | 0.38±0.03<br>a,b,c,d,e,f,g   |
| TAU 6g                 | 1.0±0.1     | 0.60±0.09<br>a         | 0.50±0.06<br>a,b | 0.47±0.08<br>a,b   | 0.44±0.05<br>a,b,c,d | 0.4±0.05<br>a,b,c,d    | 0.41±0.05<br>a,b,c,d,e,f   | 0.40±0.05<br>a,b,c,d,e,f | 0.40±0.05<br>a,b,c,d,e,f   | 0.39±0.05<br>a,b,c,d,e,f,g   |
| <b>VCO<sub>2</sub></b> | <b>1min</b> | <b>2min</b>            | <b>3min</b>      | <b>4min</b>        | <b>5min</b>          | <b>6min</b>            | <b>7min</b>                | <b>8min</b>              | <b>9min</b>                | <b>10min</b>                 |
| PLACEBO                | 0.79±0.1    | 0.49±0.07<br>a         | 0.41±0.04<br>a,b | 0.39±0.05<br>a,b   | 0.38±0.07<br>a,b     | 0.36±0.05<br>a,b,c,d,e | 0.34±0.03<br>a,b,c,d,e     | 0.33±0.07<br>a,b,c,d,e,f | 0.31±0.05<br>a,b,c,d,e,f,g | 0.30±0.05<br>a,b,c,d,e,f,g,h |
| TAU 3g                 | 0.82±0.2    | 0.53±0.1<br>a          | 0.40±0.03<br>a,b | 0.40±0.37<br>a,b   | 0.36±0.03<br>a,b,c   | 0.34±0.04<br>a,b,c,d   | 0.33±0.03<br>a,b,c,d       | 0.32±0.03<br>a,b,c,d,e   | 0.32±0.05<br>a,b,c,d       | 0.30±0.03<br>a,b,c,d,e,g     |
| TAU 6g                 | 0.87±0.1    | 0.52±0.08<br>a         | 0.42±0.06<br>a,b | 0.40±0.07<br>a,b,c | 0.36±0.04<br>a,b,c,d | 0.36±0.03<br>a,b,c,d   | 0.34±0.03<br>a,b,c,d,f     | 0.34±0.04<br>a,b,c,d     | 0.32±0.04<br>a,b,c,d,e,f,g | 0.31±0.03<br>a,b,c,d,e,f,g,h |
| <b>RQ</b>              | <b>1min</b> | <b>2min</b>            | <b>3min</b>      | <b>4min</b>        | <b>5min</b>          | <b>6min</b>            | <b>7min</b>                | <b>8min</b>              | <b>9min</b>                | <b>10min</b>                 |
| PLACEBO                | 0.86±0.07   | 0.90±0.07<br>a         | 0.88±0.06        | 0.87±0.06          | 0.88±0.07            | 0.90±0.11              | 0.89±0.13                  | 0.86±0.10<br>b,f         | 0.83±0.05<br>a,b,c,d,e,f   | 0.81±0.07<br>a,b,c,d,e,f,h,i |
| TAU 3g                 | 0.83±0.03   | 0.88±0.05<br>a         | 0.88±0.05<br>a   | 0.90±0.1<br>a      | 0.86±0.06<br>a,d     | 0.84±0.06<br>b,d       | 0.83±0.05<br>a,b,c,d,e,f,h | 0.82±0.04<br>b,c,d,e     | 0.82±0.06<br>b,c,d,e       | 0.82±0.05<br>b,c,d,e         |
| TAU 6g                 | 0.82±0.04   | 0.86±0.05<br>a         | 0.85±0.06<br>a   | 0.85±0.06          | 0.83±0.04            | 0.83±0.04              | 0.83±0.04                  | 0.83±0.04<br>i           | 0.80±0.41<br>b,c,d,g       | 0.78±0.03<br>a,b,c,d,e,g,i   |
| <b>Oxidation Lipid</b> | <b>1min</b> | <b>2min</b>            | <b>3min</b>      | <b>4min</b>        | <b>5min</b>          | <b>6min</b>            | <b>7min</b>                | <b>8min</b>              | <b>9min</b>                | <b>10min</b>                 |
| PLACEBO                | 0.21±0.14   | 0.09±0.08<br>a         | 0.09±0.05<br>a   | 0.09±0.05<br>a     | 0.08±0.06<br>a       | 0.06±0.08<br>a         | 0.08±0.08<br>a             | 0.09±0.06<br>a,f         | 0.10±0.03<br>a,f           | 0.12±0.04<br>a,c,e,f,h,i     |

| TAU 3g                   | 0.27±0.09   | 0.11±0.05<br>a | 0.09±0.05<br>a   | 0.07±0.08<br>a,b | 0.10±0.05<br>a,d     | 0.10±0.04<br>a,d     | 0.11±0.03<br>a,d         | 0.12±0.04<br>a,d         | 0.11±0.04<br>a,d           | 0.11±0.03<br>a,d             |
|--------------------------|-------------|----------------|------------------|------------------|----------------------|----------------------|--------------------------|--------------------------|----------------------------|------------------------------|
| TAU 6g                   | 0.31±0.08   | 0.14±0.07<br>a | 0.12±0.06<br>a,b | 0.12±0.07<br>a   | 0.12±0.05<br>a       | 0.12±0.04<br>a       | 0.12±0.04<br>a           | 0.11±0.04<br>a           | 0.13±0.04<br>a             | 0.14±0.04<br>a,h             |
| <b>Oxidation<br/>CHO</b> | <b>1min</b> | <b>2min</b>    | <b>3min</b>      | <b>4min</b>      | <b>5min</b>          | <b>6min</b>          | <b>7min</b>              | <b>8min</b>              | <b>9min</b>                | <b>10min</b>                 |
| PLACEBO                  | 0.66±0.28   | 0.49±0.18<br>a | 0.39±0.13<br>a,b | 0.36±0.13<br>a,b | 0.37±0.18<br>a,b     | 0.36±0.21<br>a,b     | 0.32±0.17<br>a,b         | 0.29±0.17<br>a,b,c,f     | 0.23±0.09<br>a,b,c,d,e,f,h | 0.19±0.13<br>a,b,c,d,e,f,h,i |
| TAU 3g                   | 0.57±0.18   | 0.51±0.18      | 0.41±0.16<br>a,b | 0.43±0.21<br>a   | 0.32±0.13<br>a,b,c,d | 0.27±0.12<br>a,b,c,d | 0.24±0.09<br>a,b,c,d,e,f | 0.22±0.09<br>a,b,c,d,e,g | 0.22±0.14<br>a,b,c,d,e,g   | 0.21±0.10<br>a,b,c,d,e,g     |
| TAU 6g                   | 0.60±0.25   | 0.43±0.16<br>a | 0.35±0.14<br>a,b | 0.32±0.17<br>a,b | 0.26±0.08<br>a,b,c   | 0.26±0.09<br>a,b,c   | 0.24±0.07<br>a,b,c       | 0.25±0.06<br>a,b,c       | 0.19±0.08<br>a,b,c,d,h     | 0.15±0.06<br>a,b,c,d,e,f,h,i |

Min: minute. TAU 3g: 3 grams of taurine. TAU 6g: 6 grams of taurine. RQ: respiratory quotient. Oxidation CHO: carbohydrate oxidation.

Letters represents statistical difference between time-point.

a= vs 1min; b= vs 2min; c= vs 3min; d= vs 4min; e= vs 5min; f= vs 6min; g= vs 7min; h= vs 8min, i= vs 9min; j= vs 10min.

vs= versus ( $p < 0.05$ ), by ANOVA two way repeated measures. Data expressed as mean and standard deviation (M±SD).

e.g. If letter “a” is in the time 2minutes and 3minutes, this represents that 1minute is statistically different from 2 and 3 minutes.

This representation is only to show differences between time-point in the same group/supplementation.
